# Supplementary material for: Analysis of Chemical Composition and Antioxidant Activity of Idesia polycarpa Pulp Oil from Five Regions in China
Source: MDPI journal article supplement (doi:10.3390/foods12061251), 2023-03-15
Supplement: s1 [file s1]

**Table S1** Fitting curves of bioactive compounds.

| Components   | Regression equation   | R <sup>2</sup> | Linearity range (µg/mL) |
|--------------|-----------------------|----------------|-------------------------|
| α-tocopherol | Y = 9366.5 X + 7205.1 | 0.9986         | 2.5860-103.4397         |
| β-tocopherol | Y = 9257.6 X + 757.09 | 0.9984         | 0.4016-16.0648          |
| γ-tocopherol | Y = 9292.8 X + 48558  | 0.9984         | 15.8762-635.0409        |
| δ-tocopherol | Y = 9399 X + 13782    | 0.9985         | 6.1362-245.4461         |
| Polyphenol   | Y = 0.0958 X + 0.0293 | 0.9990         | 1-15                    |

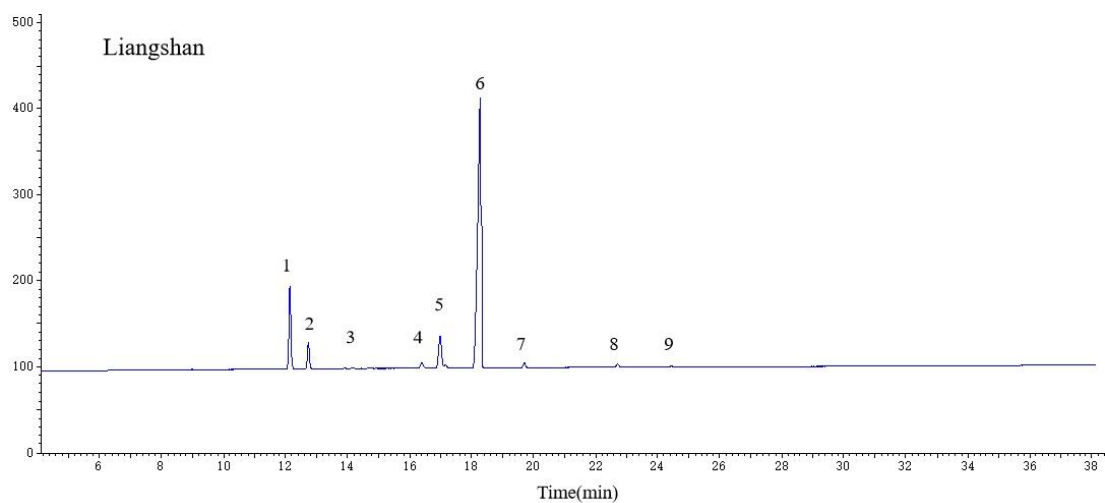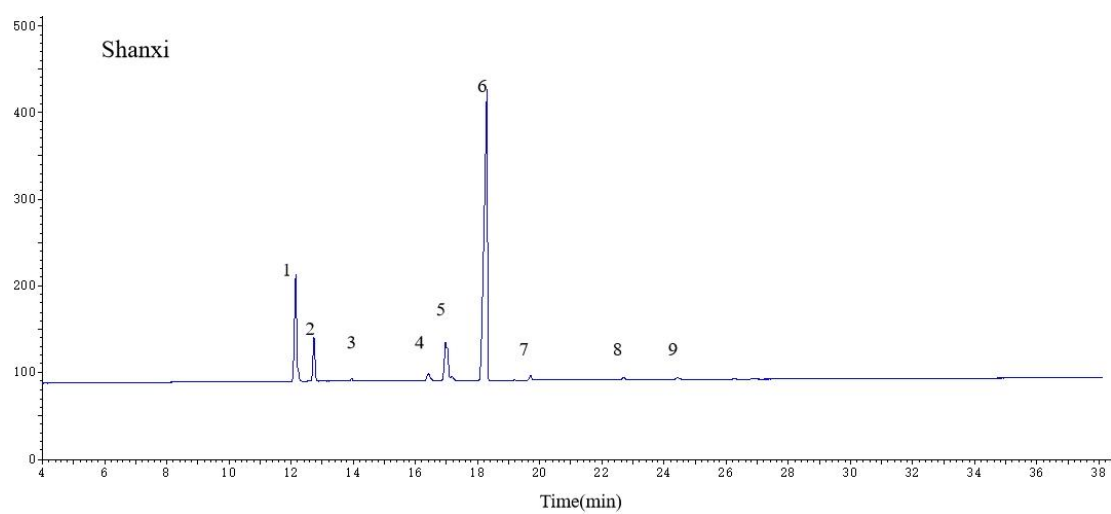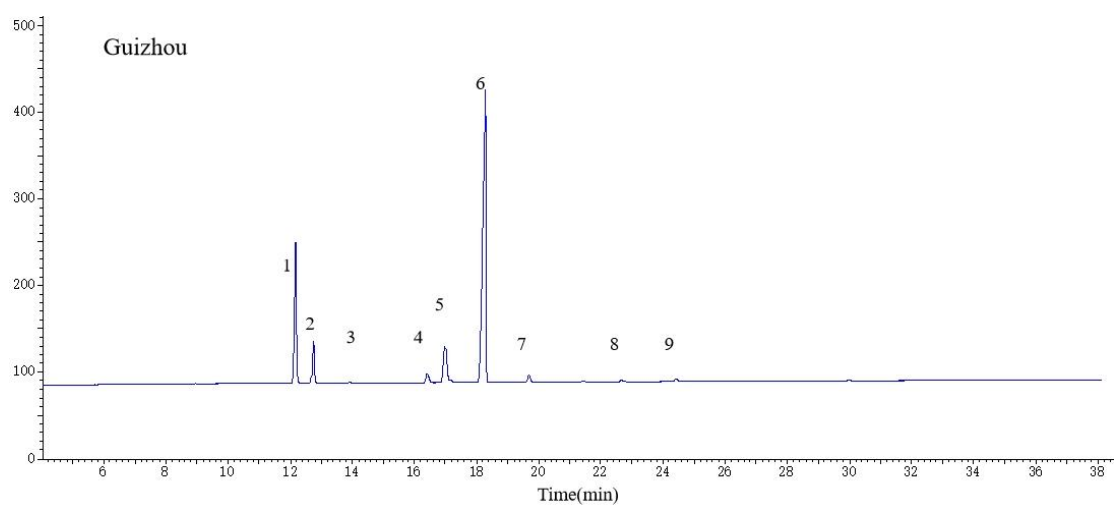

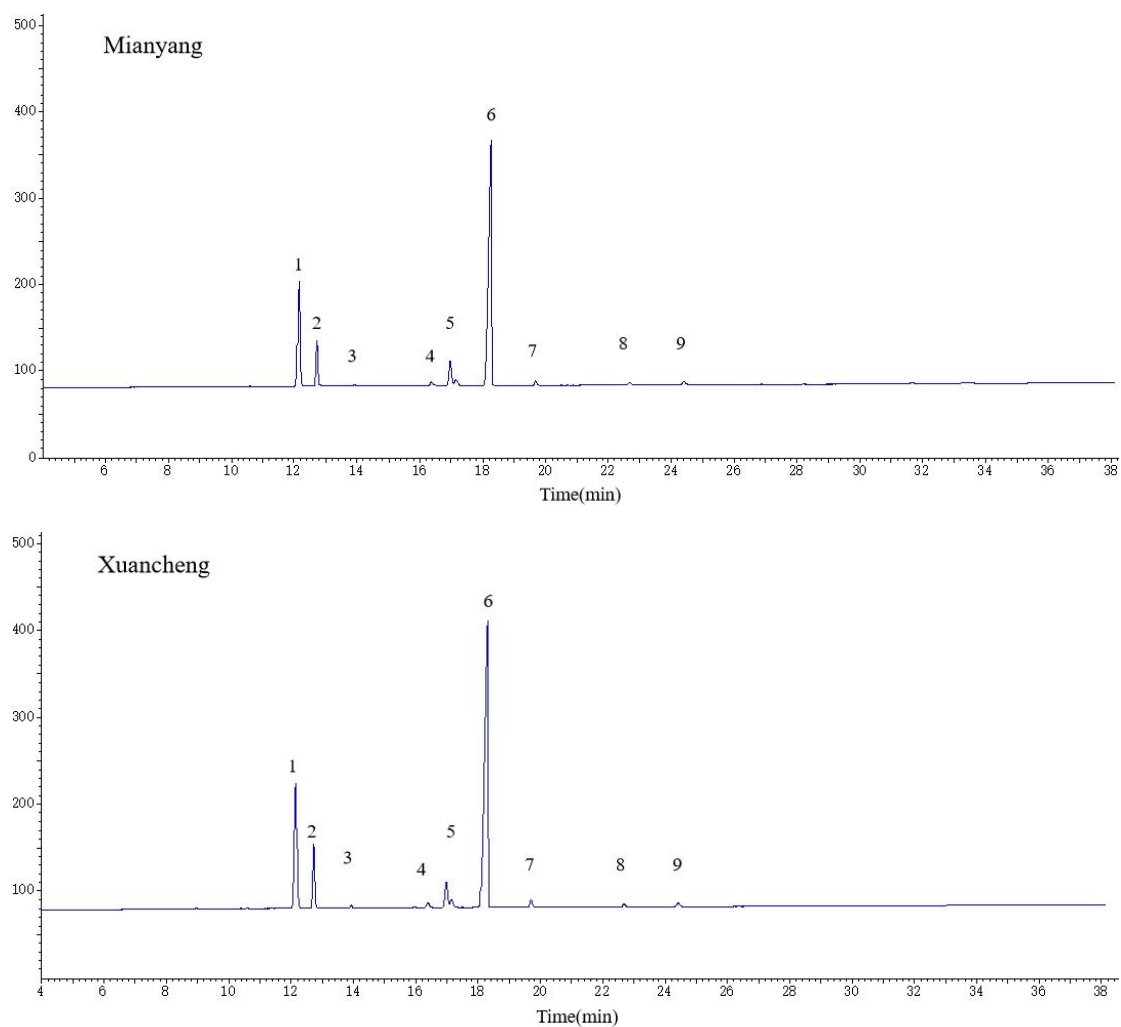

**Figure S1.** Fatty acid composition gas chromatogram of *Idesia polycarpa* pulp oil from five regions. 1- palmitic acid, 2-palmitoleic acid, 3-heptadecanoic acid, 4- stearic acid, 5-oleic acid, 6-linoleic acid, 7-linolenic acid, 8-arachidic acid, 9- heneicosanoic acid.

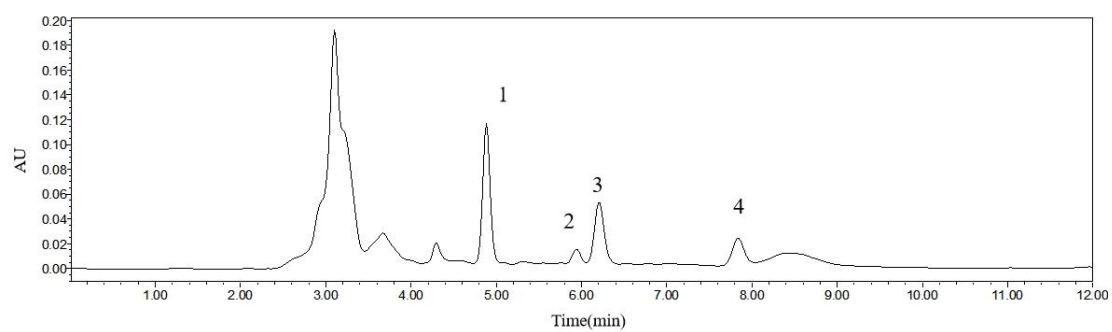

**Figure S2.** HPLC of tocopherols in *Idesia polycarpa* pulp oil. 1- $\alpha$ -tocopherol, 2- $\beta$ -tocopherol, 3- $\gamma$ -tocopherol, 4- $\delta$ -tocopherol.

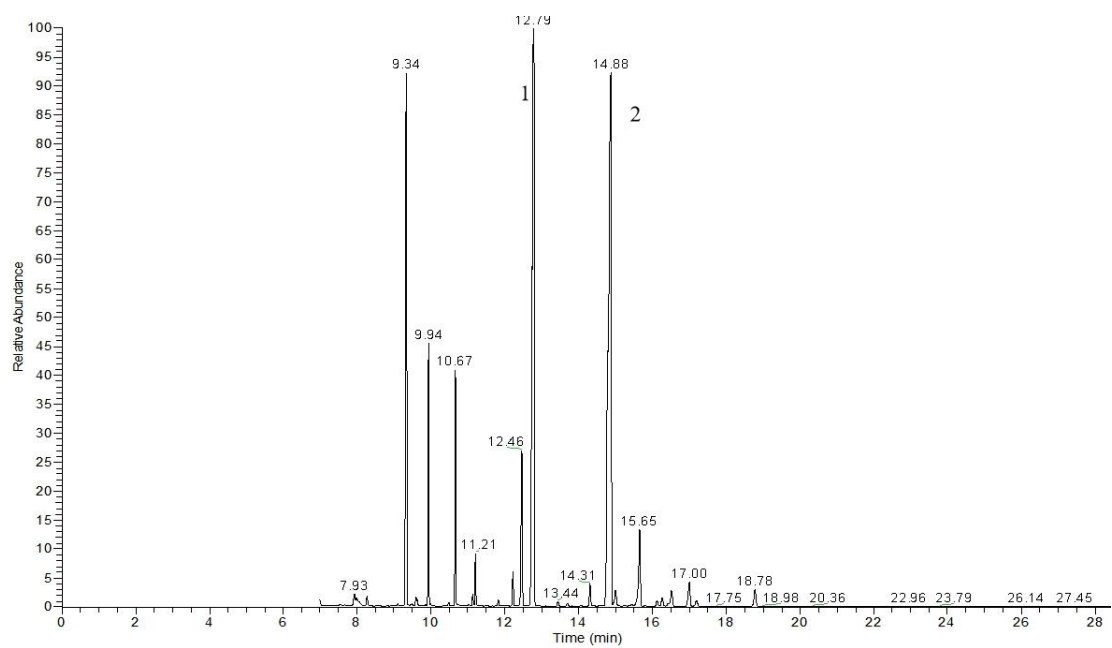

**Figure S3.** Total ion chromatogram of  $\beta$ -sitosterol in *Idesia polycarpa* pulp oil. 1- $5\alpha$ -cholestane, 2- $\beta$ -sitosterol.
